# Supplementary material
Source: PubMed Central journal article supplement (PMC4287453)
Supplement: NIHMS612210-supplement-01.pdf [file NIHMS612210-supplement-01.pdf]

**Supplementary Table 1 Odds ratios of effect of treatment on magnitude of decline from baseline for ADAPT visits only**

| Measure             | Celecoxib<br>n / N | Naproxen<br>n / N | Placebo<br>n / N | Celecoxib vs Placebo |         | Naproxen vs Placebo |         |
|---------------------|--------------------|-------------------|------------------|----------------------|---------|---------------------|---------|
|                     |                    |                   |                  | OR* (95% CI)         | p-value | OR* (95% CI)        | p-value |
| Global summary      |                    |                   |                  |                      |         |                     |         |
| ≥0.25 point decline | 219/664            | 211/646           | 319/970          | 1.00 (0.81, 1.24)    | 0.99    | 0.99 (0.80, 1.23)   | 0.95    |
| ≥0.50 point decline | 113/664            | 114/646           | 154/970          | 1.08 (0.83, 1.41)    | 0.55    | 1.14 (0.87, 1.49)   | 0.37    |
| ≥0.75 point decline | 54/664             | 55/646            | 74/970           | 1.07 (0.74, 1.55)    | 0.71    | 1.13 (0.78, 1.62)   | 0.53    |
| ≥1.00 point decline | 31/664             | 33/646            | 50/970           | 0.90 (0.57, 1.42)    | 0.64    | 0.99 (0.63, 1.56)   | 0.97    |
| ≥1.25 point decline | 22/664             | 22/646            | 30/970           | 1.07 (0.61, 1.88)    | 0.81    | 1.10 (0.63, 1.93)   | 0.73    |
| Adjusted 3MS-E      |                    |                   |                  |                      |         |                     |         |
| ≥5 point decline    | 100/664            | 103/646           | 140/970          | 1.05 (0.79, 1.38)    | 0.75    | 1.13 (0.85, 1.49)   | 0.39    |
| ≥6 point decline    | 80/664             | 69/646            | 103/970          | 1.15 (0.84, 1.57)    | 0.38    | 1.01 (0.73, 1.39)   | 0.97    |
| ≥7 point decline    | 59/664             | 51/646            | 72/970           | 1.21 (0.85, 1.71)    | 0.30    | 1.07 (0.73, 1.55)   | 0.74    |
| ≥8 point decline    | 49/664             | 41/646            | 51/970           | 1.43 (0.95, 1.23)    | 0.08    | 1.22 (0.80, 1.87)   | 0.36    |
| ≥9 point decline    | 33/664             | 33/646            | 40/970           | 1.21 (0.76, 1.95)    | 0.42    | 1.25 (0.78, 2.01)   | 0.36    |

n: number of events; N: number of people at risk; OR: odds ratio; CI: confidence interval; 3MS-E: Modified Mini-Mental State Examination

\*Calculated using logistic regression with the binary outcome of decline of given magnitude at any follow-up visit after adjusting for clinic and age strata. P-values are from Wald  $\chi^2$  test.
